# Supplementary material for: Direct quantification of in vivo mutagenesis and carcinogenesis using duplex sequencing
Source: PubMed Central journal article supplement (PMC7776782; doi:10.1073/pnas.2013724117), 2020-12-14
Supplement: pnas.2013724117.sapp.pdf [file pnas.2013724117.sapp.pdf]

## SUPPLEMENTARY INFORMATION APPENDIX

### *Inter-species contamination is robustly detected by Duplex Sequencing*

A consequence of extremely accurate error-correction next generation sequencing (ecNGS) technologies is the detection of ultra-rare intra-species contamination and how false positive alignments of those sequencing reads can bias per-nucleotide mutant frequency (MF) calculation by more than 100-fold. The false positive alignment of short reads not from the target species is particularly likely when sample processing is done near samples that are of an alternate species. This issue is exacerbated when targeting regions of high homology among all species, such as in conserved or exonic regions of the genome (**SI Appendix, Fig. S5**).

The solution we developed for handling inter-species read-pair decontamination relies on taxonomic classification of all error-corrected sequences from the entire study to ensure only the read pairs that match the target species with high confidence are kept for downstream analysis.

A taxonomy database was constructed with  $k$ -mers from human, rat, cow, and mouse. The taxonomic classifier Kraken<sup>1</sup> was used to identify error-corrected paired-end contaminating reads, as well as confidently indicating which reads were only from *Mus musculus* origin. Reads that are left unassigned due to this method are often true sequences from the source genomes, however, they contain an 'N'-call or variant base often enough such that a single  $k$ -mer cannot exist that indicates a positive classification to the target genome. Reads of ambiguous assignment were discarded as they did not contain enough sequence information to positively assign them to any of the organisms at the species level.

To eliminate confounding assignment due to the human *HRAS* transgene in the Tg-rasH2 mouse model, a masked human genome was used for all classification where the mask territory was the exact sequence copy as integrated into Tg-rasH2.

Out of a total of 52,509,726 error-corrected paired-end reads across all 62 ( $1.2 \times 10^{-4}$ %) murine tissue samples, 50,910,333 were taxonomically classified as *Mus musculus*, 34 to *Rattus norvegicus albus*, 33 ( $6.3 \times 10^{-4}$ %) to *Homo sapiens*, and 0 to *Bos taurus* (0%). Exactly 84,865 (0.2%) paired-end reads were unclassified and 1,514,494 (2.8%) were from an ambiguous taxonomic origin. Only sequence data that could be positively identified as originating from the mouse genome was reserved for downstream analysis. Furthermore, every error-corrected paired-end read supporting a variant call in this cohort underwent manual review and BLAST+ alignment using the Blast nucleotide (nt) collection to confirm the true positive rate of taxonomic classification on this error-corrected dataset as being a perfect 100.000000%.

Tissue samples from vehicle control exposed mouse ID 9951 contained 29 paired-end reads from *Homo sapiens* and a tissue sample from the benzo[a]pyrene exposed mouse ID 9310 contained 28 paired-end reads from *Rattus norvegicus albus* suggesting that most contaminating events in both mouse cohorts were punctuated and private to just a few samples. The mean per-nucleotide mutant frequency for mouse 9951 is  $1.2 \times 10^{-7}$  and if contaminating reads were not removed, the mean per-nucleotide mutant frequency would have risen to a rate equivalent, or greater than, the mutant frequencies detected in the positive control samples.

## SUPPLEMENTARY FIGURES

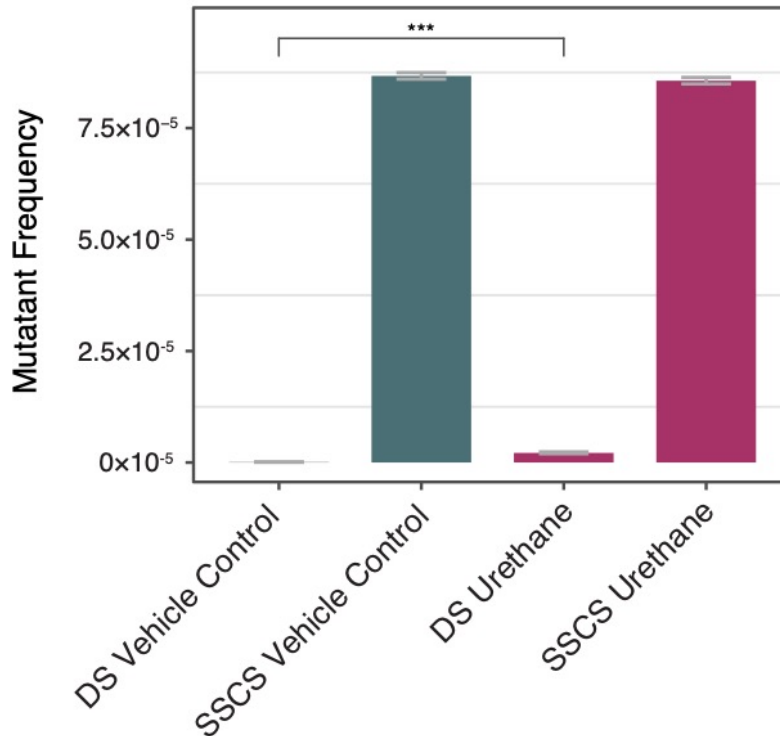

**Figure S1. MF comparison in a mutagen exposed sample with and without duplex consensus level error-correction.** Alternative forms of error-corrected next generation sequencing (ecNGS) may perform the error-correction on single-strands without resolving a complete duplex consensus. These single-strand error-correction forms of ecNGS are not sensitive enough for resolving small effect sizes in mutant frequency induction from experiments like those in the TGR assays. To illustrate this, we performed single-strand error-correction data using Duplex Sequencing Adapters on two Tg-rasH2 mouse lung samples, one treated with urethane and one treated with the vehicle control. The per-nucleotide mutant frequencies for the vehicle control and urethane-exposed samples are  $8.2 \times 10^{-8}$  and  $2.15 \times 10^{-6}$  using Duplex Sequencing. When measuring the same metric using only single-strand consensus sequencing (SSCS), the two mutant frequencies rise to  $8.6 \times 10^{-5}$  and  $8.6 \times 10^{-5}$ , respectively. The difference between the mutant frequencies of the exposed and control tissues using Duplex Sequencing are different with a p-value less than  $2.2 \times 10^{-16}$ . This is in contrast to the single-strand error-correction measurements of mutant frequency which are not significant (p-value 0.98). Both statistical tests were performed using the Fisher's exact test for count data. Error bars reflect 95% confidence intervals.

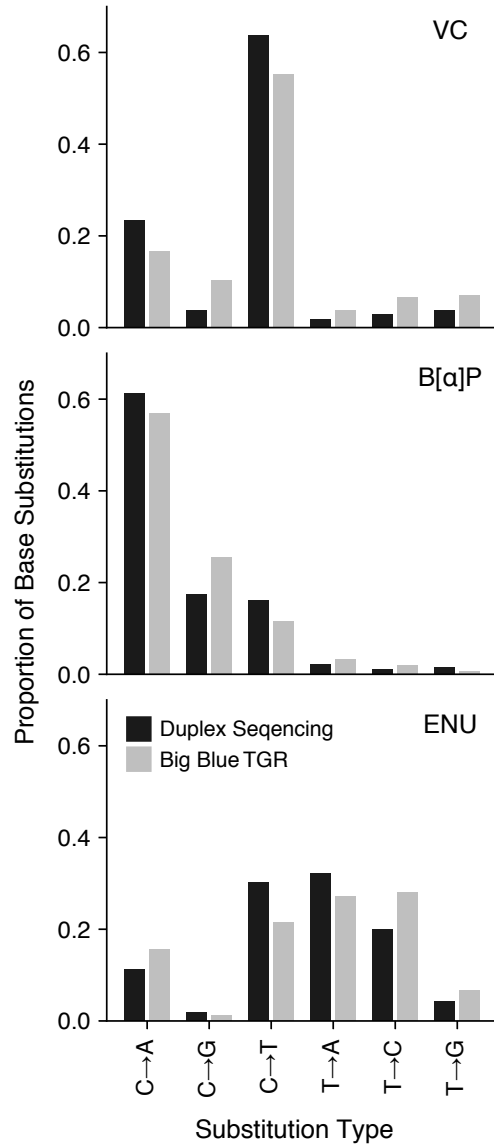

**Figure S2. Mutation spectra observed by Duplex Sequencing of genomic DNA and individually sampled mutant plaques from the TGR assay are equivalent.** The proportion of single nucleotide variants (SNV) within the *cII* gene are shown for individually picked mutant phage plaques produced from Big Blue rodent tissue and Duplex Sequencing of the *cII* transgene directly from gDNA. SNVs are designated with pyrimidine as the reference. The two methods yield the same spectrum for all treatment groups ( $p$ -values  $>0.999$ , chi-squared test). Proportions were calculated by dividing the total observations of SNVs by the total number of duplex bases within the *cII* interval and normalizing to one.

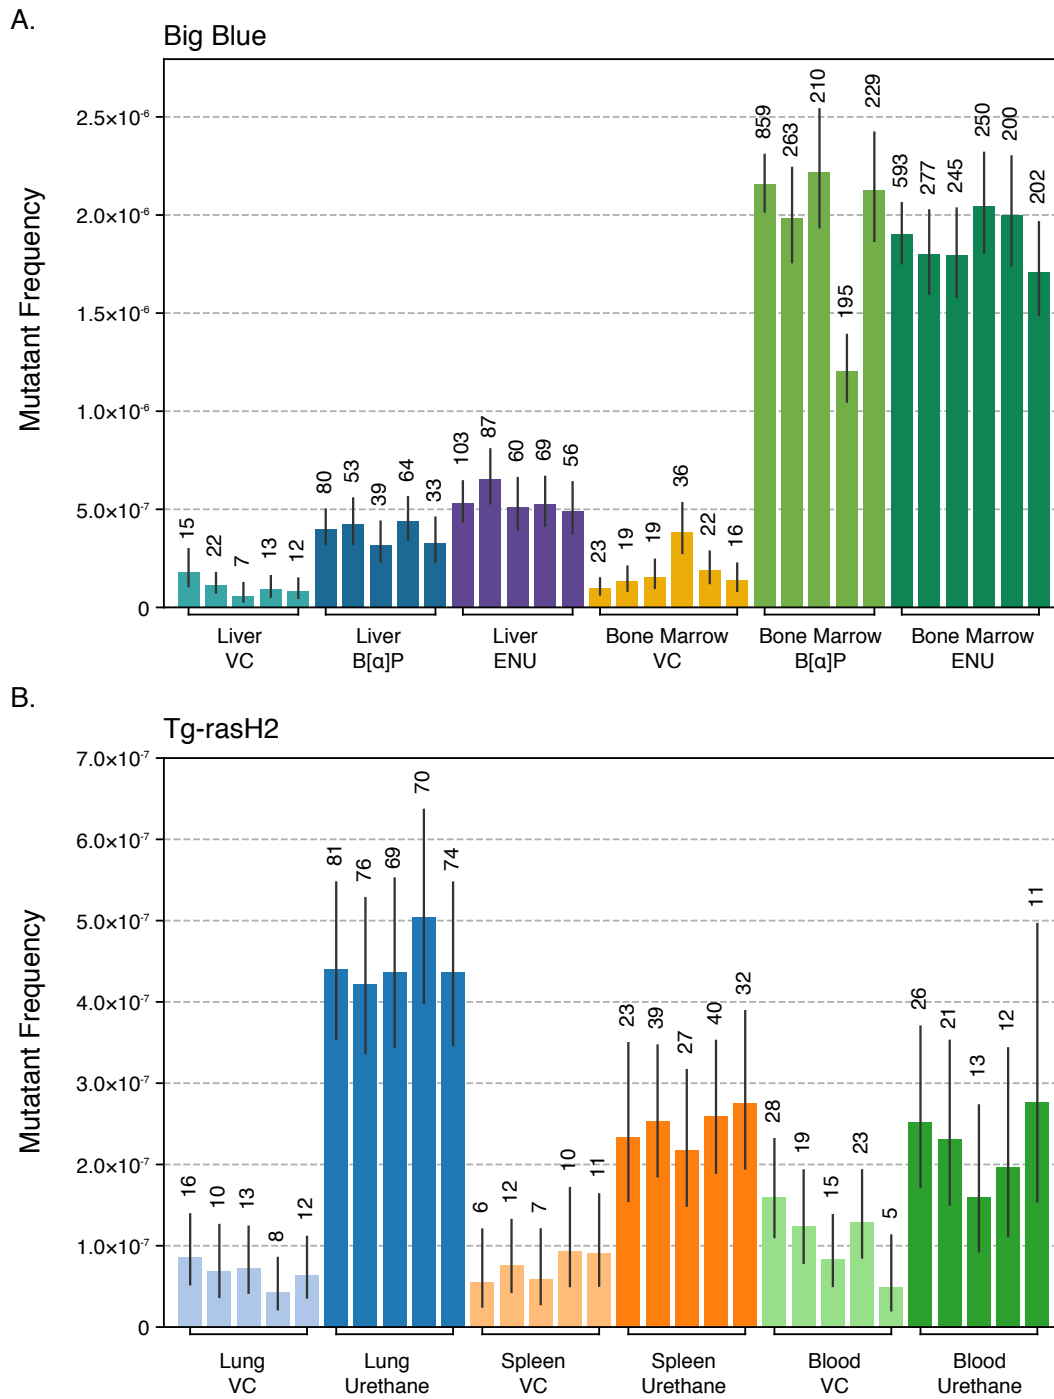

**Figure S3. Per-sample mutant frequencies for all tissues and treatment groups. A)** Big Blue cohort samples. **B)** Tg-rasH2 cohort samples. Mutant frequency was calculated as the total number of non-germline mutant duplex consensus base pairs divided by the total number of duplex consensus base pairs per sample. Error bars reflect 95% binomial confidence intervals. Integers above each bar represent the total number of mutant duplex consensus alleles observed per sample. VC, Vehicle Control.

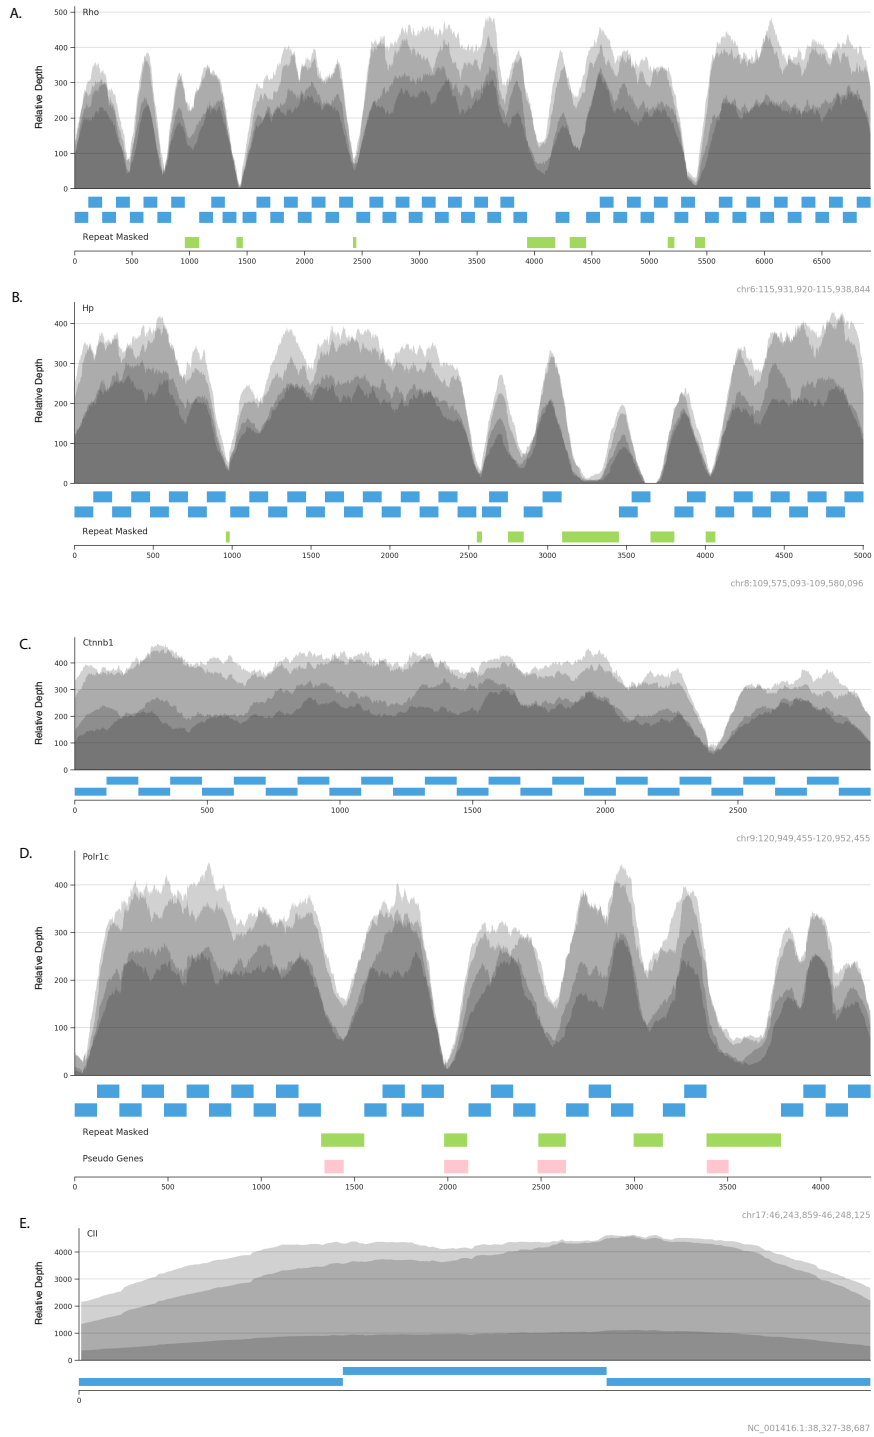

**Figure S4. Consensus alignment data and probe design over endogenous and transgenic targets in the Big Blue mouse.** Hybrid selection targets were carefully designed to abut no closer than 10 base pairs from a repeat masked (green) or pseudogene (pink) intervals. Individual baits are colored as blue intervals underlying the read coverage track. The four coverage tracks shown in all panels are from four randomly selected library preparations to illustrate the relatedness of coverage profile and bait layout. **A)** Example coverage and panel design over *Rho*, **B)** *Hp*, **C)** *Ctnnb1*, **D)** *Polr1c* and **E)** the Big Blue mouse *cII* transgene.

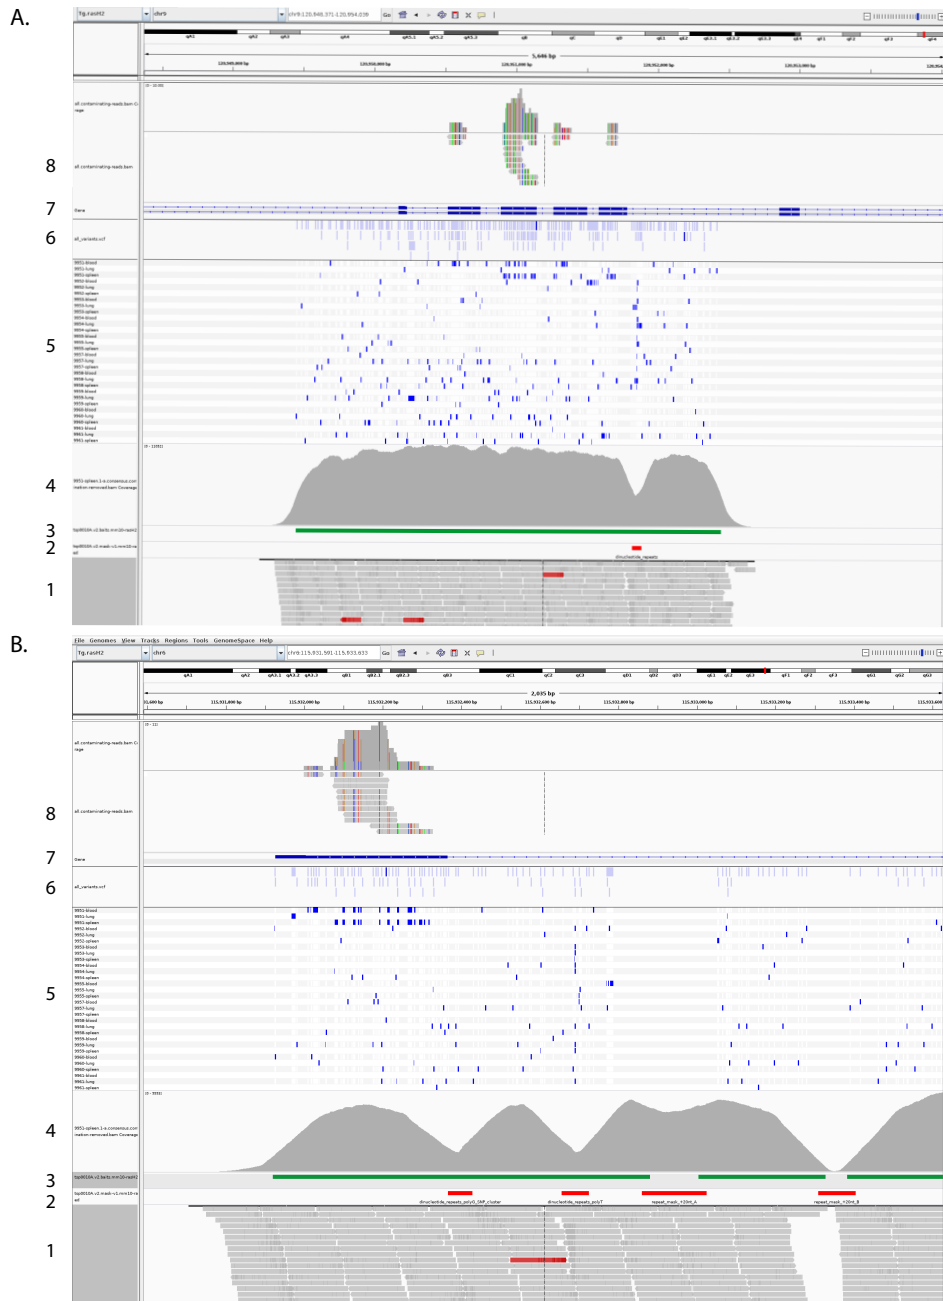

**Figure S5. Ultra-rare contamination is easily detected by Duplex Sequencing but can be filtered from alignment data.** Contamination of homologous species DNA drastically increases observed apparent mutations and confounds experimental frequency results in absence of identification and removal. **A)** A genomic view of the *Ctnnb1* gene in the transgenic mouse Tg-rasH2 (mm10). Tracks from bottom to top (1) consensus paired-end read alignments (2) repeat-masked regions (3) baited region (4) density of consensus paired-end read alignments (5) unfiltered variant calls for all samples (6) silhouette of unfiltered variant calls for all samples (7) transcript diagram of *Ctnnb1* (8) reads identified as contamination from all samples. **B)** A genomic view of the *Rho* gene in the transgenic mouse Tg-rasH2 (mm10). Tracks from bottom to top (1) consensus paired-end read alignments (2) repeat-masked regions (3) baited region (4) density of consensus paired-end read alignments (5) unfiltered variant calls for all samples (6) silhouette of unfiltered variant calls for all samples (7) transcript diagram of *Rho* (8) reads identified as contamination from all samples

## SUPPLEMENTARY TABLES

| Treatment               | Tissue      | Big Blue Mouse ID     | No. of Phage Screened | No. of Mutant Phage | Mutant Frequency ( $\times 10^{-6}$ ) |     |       |
|-------------------------|-------------|-----------------------|-----------------------|---------------------|---------------------------------------|-----|-------|
| Vehicle Control         | Liver       | 9301                  | 795,000               | 32                  | 40.3                                  |     |       |
|                         |             | 9302                  | 479,000               | 24                  | 50.1                                  |     |       |
|                         |             | 9303                  | 851,667               | 36                  | 42.3                                  |     |       |
|                         |             | 9304                  | 1,005,000             | 37                  | 36.8                                  |     |       |
|                         |             | 9305                  | 1,090,000             | 57                  | 52.3                                  |     |       |
|                         |             | 9306                  | 1,878,333             | 75                  | 39.9                                  |     |       |
|                         | Bone Marrow | 9301                  | 1,056,667             | 43                  | 40.7                                  |     |       |
|                         |             | 9302                  | 883,333               | 15                  | 17.0                                  |     |       |
|                         |             | 9303                  | 945,000               | 27                  | 28.6                                  |     |       |
|                         |             | 9304                  | 814,667               | 30                  | 36.8                                  |     |       |
|                         |             | 9305                  | 452,333               | 22                  | 48.6                                  |     |       |
|                         |             | 9306                  | 1,122,333             | 64                  | 57.0                                  |     |       |
| Benzo[ $\alpha$ ]pyrene | Liver       | 9307                  | 1061,667              | 183                 | 172.4                                 |     |       |
|                         |             | 9308                  | 533,333               | 140                 | 262.5                                 |     |       |
|                         |             | 9309                  | 1,048,333             | 212                 | 202.2                                 |     |       |
|                         |             | 9310                  | 73,8333               | 159                 | 215.3                                 |     |       |
|                         |             | 9311                  | 898,333               | 161                 | 179.2                                 |     |       |
|                         |             | 9307                  | 461,667               | 359                 | 777.6                                 |     |       |
|                         | Bone Marrow | 9308                  | 636,667               | 438                 | 688.0                                 |     |       |
|                         |             | 9309                  | 982,167               | 563                 | 573.2                                 |     |       |
|                         |             | 9310                  | 480,000               | 295                 | 614.6                                 |     |       |
|                         |             | 9311                  | 486,667               | 356                 | 731.5                                 |     |       |
|                         |             | N-ethyl-N-nitrosourea | Liver                 | 9313                | 603,333                               | 129 | 213.8 |
|                         |             |                       |                       | 9314                | 268,000                               | 62  | 231.3 |
| 9315                    | 1,091,667   |                       |                       | 211                 | 193.3                                 |     |       |
| 9316                    | 926,667     |                       |                       | 128                 | 138.1                                 |     |       |
| 9318                    | 764,333     |                       |                       | 121                 | 158.3                                 |     |       |
| Bone Marrow             | 9313        |                       | 1,310,000             | 413                 | 315.3                                 |     |       |
|                         | 9314        |                       | 1,443,333             | 509                 | 352.7                                 |     |       |
|                         | 9315        |                       | 1,081,667             | 336                 | 310.6                                 |     |       |
|                         | 9316        | 1,120,000             | 501                   | 447.3               |                                       |     |       |
|                         | 9317        | 555,333               | 279                   | 502.4               |                                       |     |       |
|                         | 9318        | 966,667               | 486                   | 502.8               |                                       |     |       |

**Table S1: Summary of *cII* mutant, and total, phage counts from Big Blue mouse samples assayed via the transgenic rodent assay.**

| Treatment    | Tissue | Mouse ID | Duplex Base Pairs    | Duplex Read Pairs | Contaminant Read Pairs |    |
|--------------|--------|----------|----------------------|-------------------|------------------------|----|
| VC           | Liver  | 9301     | 83,347,487           | 447,345           | 3                      |    |
|              |        | 9302     | 189,664,560          | 1,073,461         |                        |    |
|              |        | 9303     | 116,151,844          | 644,555           |                        |    |
|              |        | 9305     | 139,635,456          | 758,419           |                        |    |
|              |        | 9306     | 142,517,573          | 788,174           |                        |    |
|              |        | 9306     | 142,517,573          | 788,174           |                        |    |
|              | Marrow | 9301     | 233,209,849          | 1,299,710         |                        |    |
|              |        | 9302     | 142,676,998          | 816,171           |                        |    |
|              |        | 9303     | 122,126,416          | 691,682           |                        |    |
|              |        | 9304     | 93,720,485           | 516,633           |                        |    |
|              |        | 9305     | 117,074,653          | 647,591           |                        |    |
|              |        | 9306     | 116,291,270          | 654,545           |                        |    |
| BaP          | Liver  | 9307     | 199,781,219          | 1,116,103         | 1                      |    |
|              |        | 9308     | 124,921,520          | 690,952           |                        |    |
|              |        | 9309     | 121,889,164          | 668,854           |                        | 2  |
|              |        | 9310     | 145,497,107          | 787,576           |                        |    |
|              |        | 9311     | 101,239,854          | 558,976           |                        | 28 |
|              | Marrow | 9307     | 398,180,336          | 2,211,892         |                        |    |
|              |        | 9308     | 132,469,507          | 737,436           |                        |    |
|              |        | 9309     | 94,683,250           | 534,719           |                        |    |
|              |        | 9310     | 161,559,440          | 908,313           |                        |    |
|              |        | 9311     | 107,702,271          | 598,033           |                        |    |
|              |        | 9311     | 107,702,271          | 598,033           |                        |    |
| ENU          | Liver  | 9313     | 194,351,371          | 1,094,930         |                        |    |
|              |        | 9314     | 133,182,703          | 734,197           |                        |    |
|              |        | 9315     | 117,123,025          | 649,237           |                        |    |
|              |        | 9316     | 131,236,780          | 728,655           |                        |    |
|              |        | 9318     | 114,044,868          | 624,536           |                        |    |
|              | Marrow | 9313     | 311,985,917          | 1,754,334         |                        |    |
|              |        | 9314     | 154,012,541          | 857,890           |                        |    |
|              |        | 9315     | 136,572,030          | 757,932           |                        |    |
|              |        | 9316     | 122,129,838          | 711,785           |                        |    |
|              |        | 9317     | 99,925,780           | 536,425           |                        |    |
|              |        | 9318     | 118,085,724          | 680,974           |                        |    |
| <b>Total</b> |        |          | <b>4,716,990,836</b> | <b>26,282,035</b> | <b>34</b>              |    |

**Table S2. Sequencing summary of the Big Blue mouse samples including consensus duplex bases and read pairs assayed.** Almost 5 billion duplex bases were generated from 26 million duplex consensus read pairs. Only 34 read pairs were positively assigned to either the *Rattus norvegicus albus* or *Homo sapiens* species and were removed prior to variant calling.



| Treatment    | Tissue | Mouse ID    | Duplex Base Pairs    | Duplex Read Pairs | Contaminant Read Pairs |
|--------------|--------|-------------|----------------------|-------------------|------------------------|
| VC           | Blood  | 9951        | 207,394,262          | 1,086,331         | 10                     |
|              |        | 9952        | 182,197,208          | 968,700           |                        |
|              |        | 9953        | 213,403,886          | 1,082,589         | 1                      |
|              |        | 9954        | 211,788,461          | 1,122,824         |                        |
|              |        | 9955        | 122,203,569          | 672,834           |                        |
|              | Lung   | 9951        | 223,122,766          | 1,147,311         |                        |
|              |        | 9952        | 174,477,089          | 915,140           |                        |
|              |        | 9953        | 214,233,783          | 1,099,934         | 1                      |
|              |        | 9954        | 221,040,720          | 1,140,582         |                        |
|              |        | 9955        | 225,338,412          | 1,159,455         |                        |
|              | Spleen | 9951        | 128,760,653          | 679,168           | 19                     |
|              |        | 9952        | 189,196,859          | 982,779           | 2                      |
|              |        | 9953        | 142,603,705          | 755,718           |                        |
|              |        | 9954        | 127,428,088          | 660,354           |                        |
|              |        | 9955        | 142,475,597          | 755,444           |                        |
| Urethane     | Blood  | 9957        | 120,633,024          | 685,489           |                        |
|              |        | 9958        | 106,729,358          | 597,808           |                        |
|              |        | 9959        | 95,461,826           | 564,675           |                        |
|              |        | 9960        | 71,696,388           | 442,693           |                        |
|              |        | 9961        | 46,755,705           | 326,118           |                        |
|              | Lung   | 9957        | 219,224,515          | 1,144,532         |                        |
|              |        | 9958        | 214,603,131          | 1,107,643         |                        |
|              |        | 9959        | 188,293,412          | 961,323           |                        |
|              |        | 9960        | 164,292,248          | 838,850           |                        |
|              |        | 9961        | 201,809,864          | 1,039,777         |                        |
| Spleen       | 9957   | 116,655,635 | 621,762              |                   |                        |
|              | 9958   | 183,345,724 | 935,859              |                   |                        |
|              | 9959   | 146,584,262 | 776,730              |                   |                        |
|              | 9960   | 183,685,874 | 954,588              |                   |                        |
|              | 9961   | 138,129,660 | 708,501              |                   |                        |
| <b>Total</b> |        |             | <b>4,348,868,321</b> | <b>25,982,044</b> | <b>33</b>              |

**Table S3. Sequencing summary of the Tg-rasH2 mouse samples including consensus duplex bases and read pairs assayed.** Similar to the experimental design for sequencing of the Big Blue mouse samples, nearly 5 billion duplex base pairs were generated from 26 million duplex consensus read pairs from the Tg-rasH2 sample set. From these samples, 33 contaminating read pairs were detected from both *Rattus norvegicus albus* and *Homo sapiens* species. These reads were removed prior to downstream analysis.

| Mouse ID | Tissue | Treatment | Variant Allele Depth | Total Allele Depth | Variant Allele Frequency |
|----------|--------|-----------|----------------------|--------------------|--------------------------|
| 9957     | Lung   | Urethane  | 320                  | 17,644             | 1.8136%                  |
| 9958     | Lung   | Urethane  | 189                  | 17,477             | 1.0814%                  |
| 9959     | Lung   | Urethane  | 61                   | 14,686             | 0.4154%                  |
| 9961     | Lung   | Urethane  | 17                   | 15,854             | 0.1072%                  |
| 9961     | Spleen | Urethane  | 2                    | 10,809             | 0.0185%                  |
| 9951     | Blood  | VC        | 0                    | 16,218             |                          |
| 9952     | Blood  | VC        | 0                    | 14,198             |                          |
| 9953     | Blood  | VC        | 0                    | 17,094             |                          |
| 9954     | Blood  | VC        | 0                    | 16,626             |                          |
| 9955     | Blood  | VC        | 0                    | 10,072             |                          |
| 9957     | Blood  | Urethane  | 0                    | 9,862              |                          |
| 9958     | Blood  | Urethane  | 0                    | 8,788              |                          |
| 9959     | Blood  | Urethane  | 0                    | 8,536              |                          |
| 9960     | Blood  | Urethane  | 0                    | 7,232              |                          |
| 9961     | Blood  | Urethane  | 0                    | 5,763              |                          |
| 9951     | Lung   | VC        | 0                    | 17,658             |                          |
| 9952     | Lung   | VC        | 0                    | 13,040             |                          |
| 9953     | Lung   | VC        | 0                    | 17,126             |                          |
| 9954     | Lung   | VC        | 0                    | 17,742             |                          |
| 9955     | Lung   | VC        | 0                    | 18,150             |                          |
| 9960     | Lung   | Urethane  | 0                    | 11,886             |                          |
| 9951     | Spleen | VC        | 0                    | 9,073              |                          |
| 9952     | Spleen | VC        | 0                    | 14,586             |                          |
| 9953     | Spleen | VC        | 0                    | 9,794              |                          |
| 9954     | Spleen | VC        | 0                    | 8,878              |                          |
| 9955     | Spleen | VC        | 0                    | 9,824              |                          |
| 9957     | Spleen | Urethane  | 0                    | 7,541              |                          |
| 9958     | Spleen | Urethane  | 0                    | 14,597             |                          |
| 9959     | Spleen | Urethane  | 0                    | 10,444             |                          |
| 9960     | Spleen | Urethane  | 0                    | 14,590             |                          |

**Table S4. Early neoplastic evolution is detected with Duplex Sequencing in the cancer-predisposed mouse Tg-rasH2.** The variant allele counts of A·T→T·A mutations at codon 61 in the human *HRAS* transgene in the Tg-rasH2 mouse model. The variant allele counts observed at this locus are those of A·T→T·A in the context CTG for urethane exposed tissues. All but one urethane exposed lung tissue harbors a variant at significant clonality. A single urethane exposed splenic sample has a small clone of two counts (0.018%) at this locus.

## **SUPPLEMENTARY DATA FILES**

**Database S1.** Tabular text file of all variant calls for the Big Blue samples in MUT format.

**Database S2.** Tabular text file of all variant calls for the Tg-rasH2 samples in MUT format.

## **DUPLEX READ DATA FILES**

Final filtered and decontaminated error-corrected alignments for all 62 mouse samples in the BAM file format are deposited in the Sequence Read Archive under BioProject accession PRJNA673916.

## **REFERENCES**

1. Wood, D. E. & Salzberg, S. L. Kraken: ultrafast metagenomic sequence classification using exact alignments. *Genome Biol.* **15**, 1–12 (2014).
